# Supplementary material
Source: Springer Nature journal article supplement (https://www.springermedizin.de/resource/supplementary/12935_2011_322_MOESM7_ESM.pdf/9540288)

Meningioma tissue

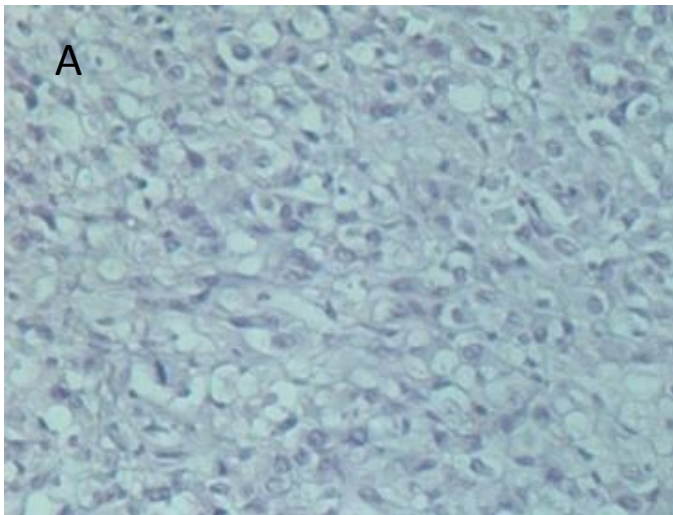

Glioma tissue

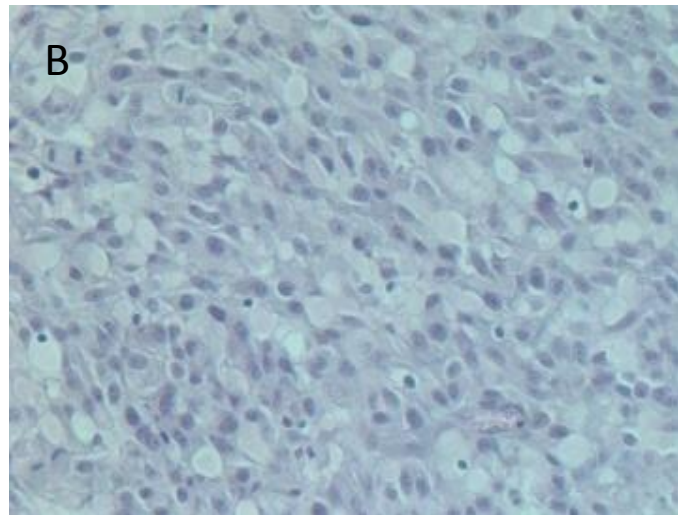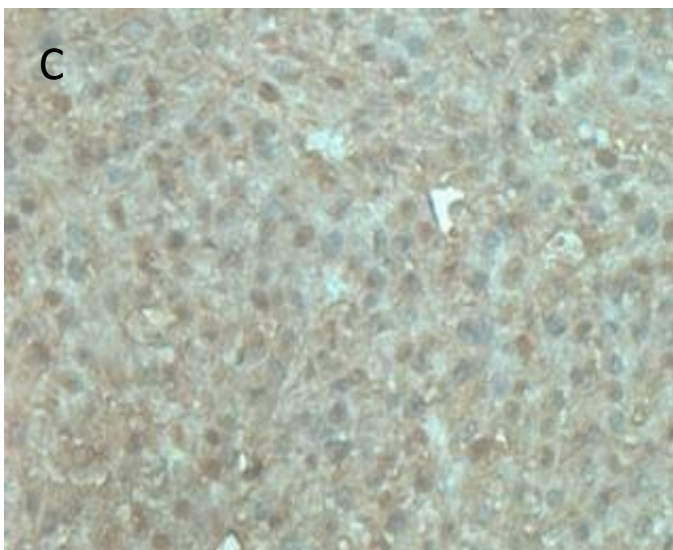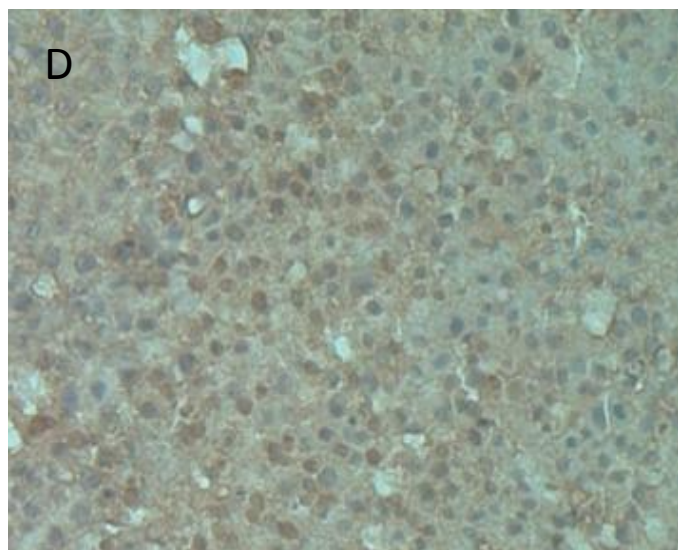

Supplement: MOESM7 [file 9540288]
